# Supplementary material for: Identifying and applying a highly selective probe to simultaneously determine the O-glucuronidation activity of human UGT1A3 and UGT1A4
Source: PubMed Central journal article supplement (PMC4401096; doi:10.1038/srep09627), 2015-04-17
Supplement: srep09627-s1.pdf [file srep09627-s1.pdf]

## Supplementary Data

### **Identifying and applying a highly selective probe to simultaneously determine the *O*-glucuronidation activity of human UGT1A3 and UGT1A4**

Li Jiang,<sup>1,+</sup> Si-Cheng Liang,<sup>2,3,+</sup> Chao Wang,<sup>1</sup> Guang-Bo Ge,<sup>2</sup> Xiao-Kui Huo,<sup>1</sup> Xiao-Yi Qi,<sup>4</sup> Sa Deng,<sup>1</sup> Ke-Xin Liu<sup>1</sup> and Xiao-Chi Ma<sup>1,\*</sup>

<sup>1</sup> College of Pharmacy, Key Laboratory of Pharmacokinetic and Drug Transport of Liaoning, Academy of Integrative Medicine, Dalian Medical University, Dalian, 116044, China.

<sup>2</sup> Laboratory of Pharmaceutical Resource Discovery, Dalian Institute of Chemical Physics, Chinese Academy of Sciences, Dalian, China.

<sup>3</sup> Graduate School of Chinese Academy of Sciences, Beijing, China.

<sup>4</sup> Second Affiliated Hospital of Dalian Medical University, Dalian, China

Correspondence and requests for materials should be addressed to X.C. Ma (E-mail: maxc1978@163.com)

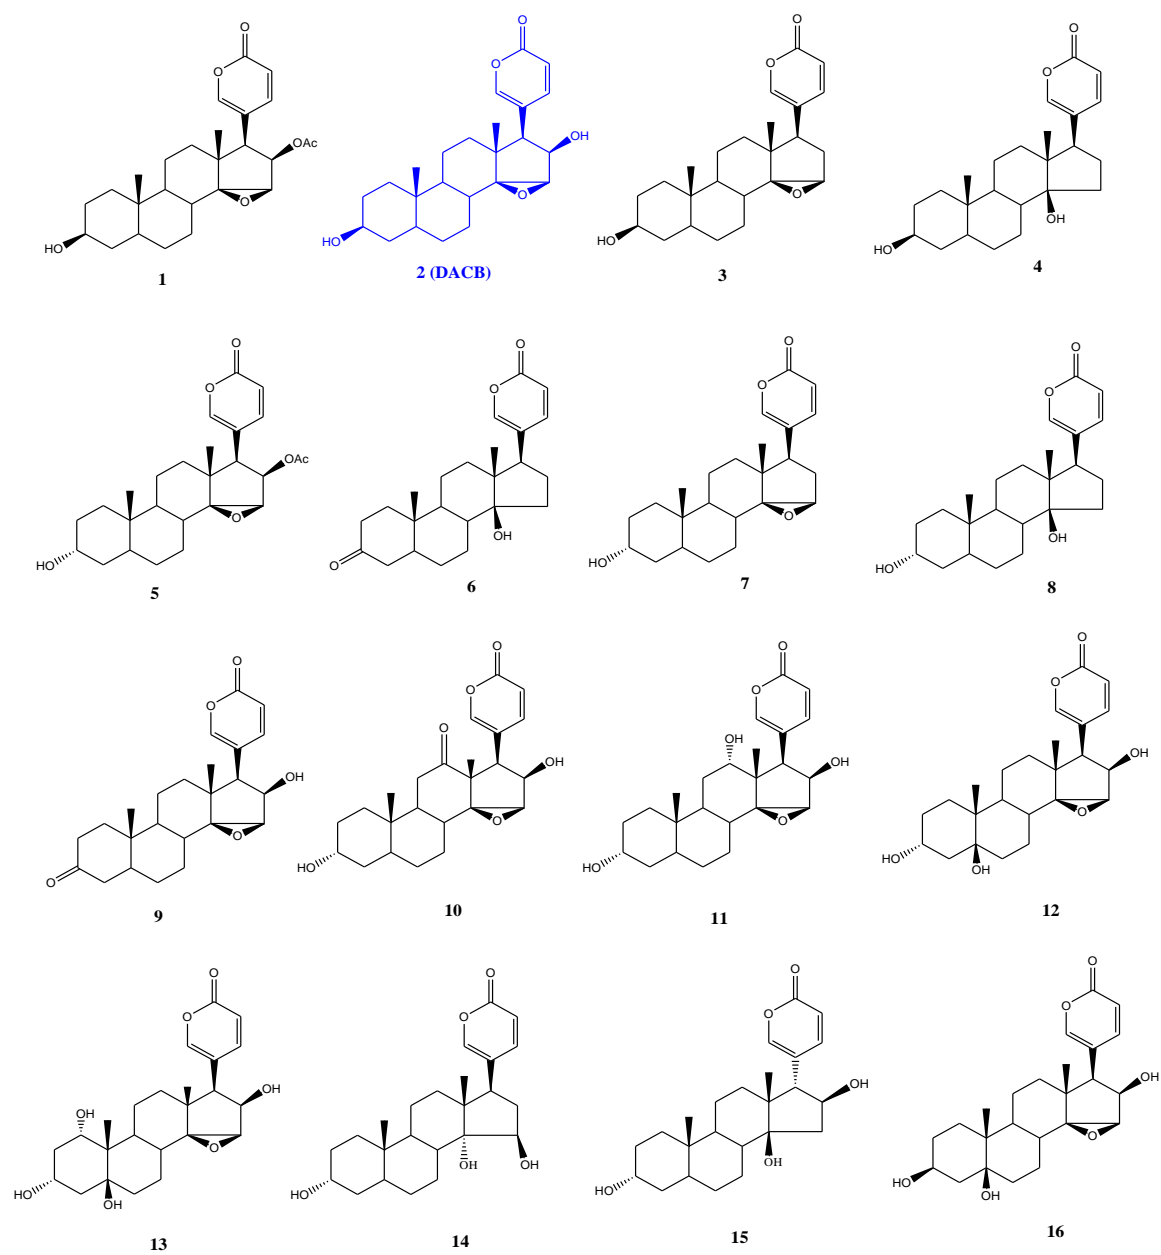

**Fig. S1** Chemical structures of bufadienolides (1-16) used in the present work

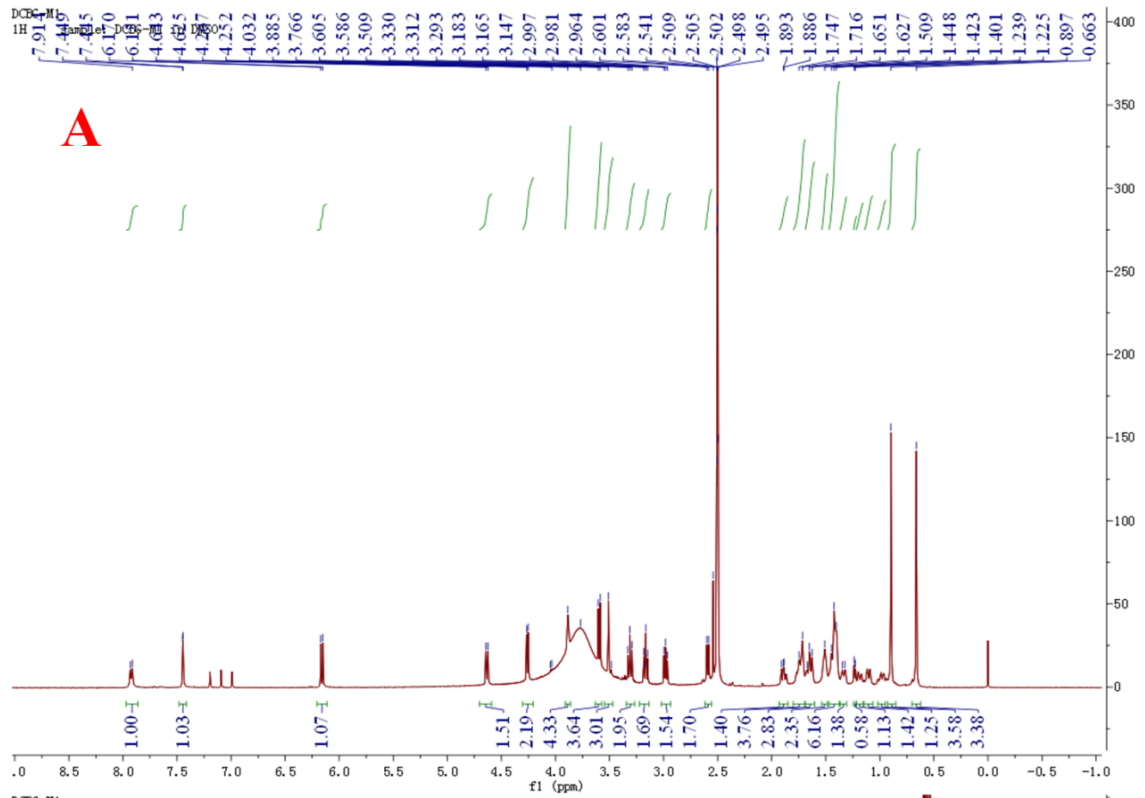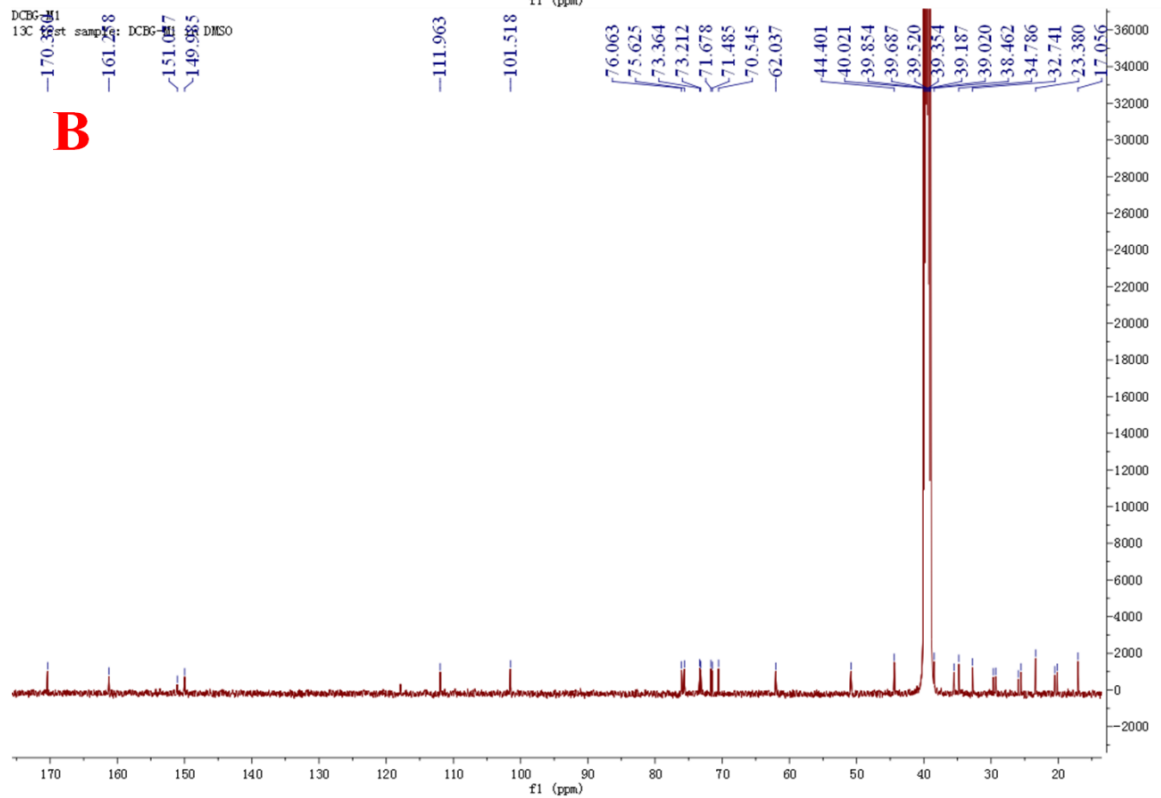

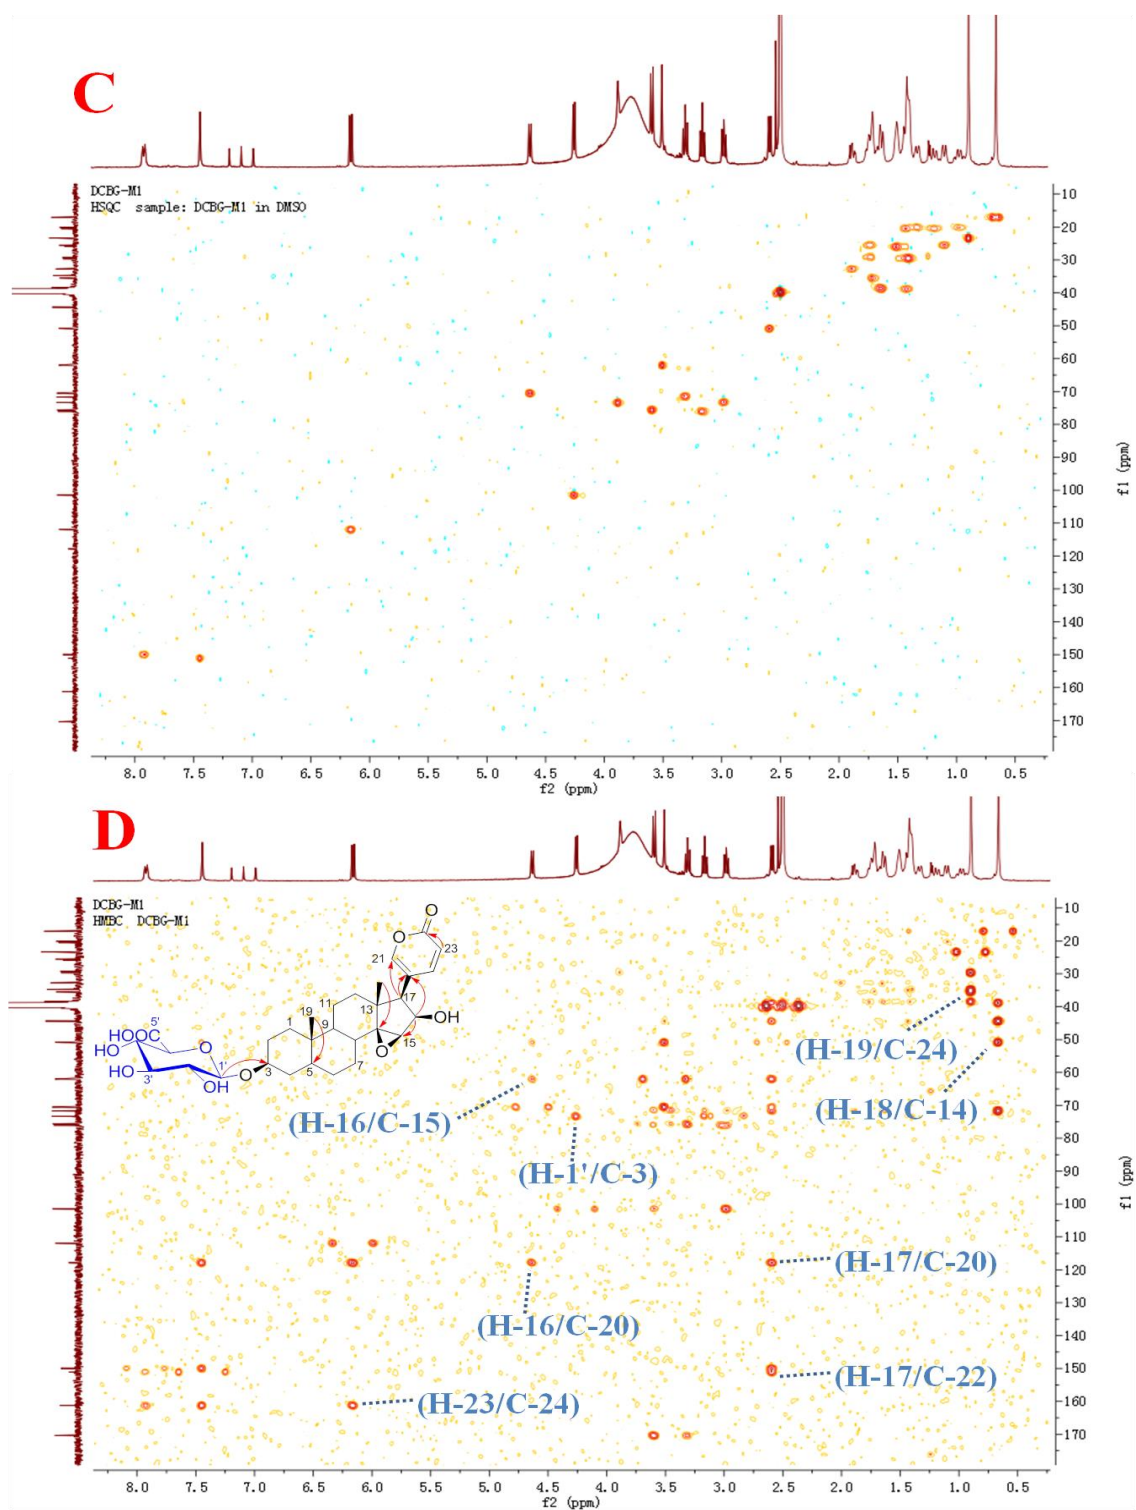

**Fig. S2.** The spectral data of M-1 (500MHz, DMSO).  $^1\text{H}$ -NMR (A);  $^{13}\text{C}$ -NMR (B); HMQC (C) and HMBC (D).

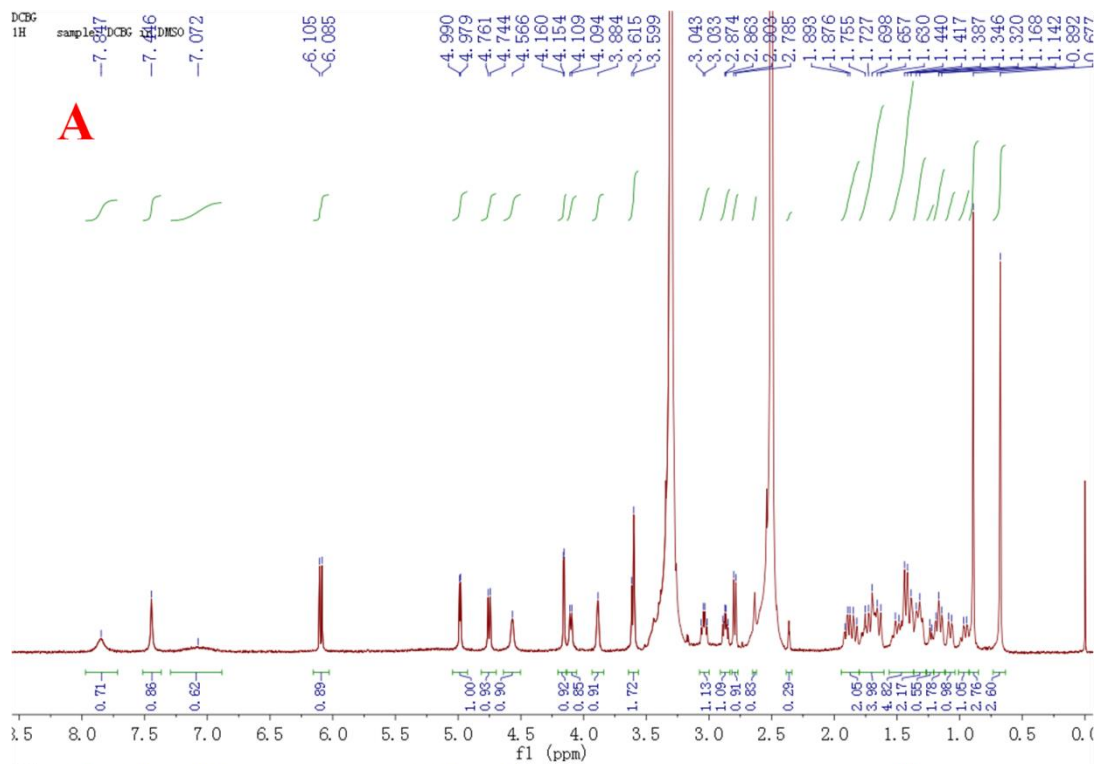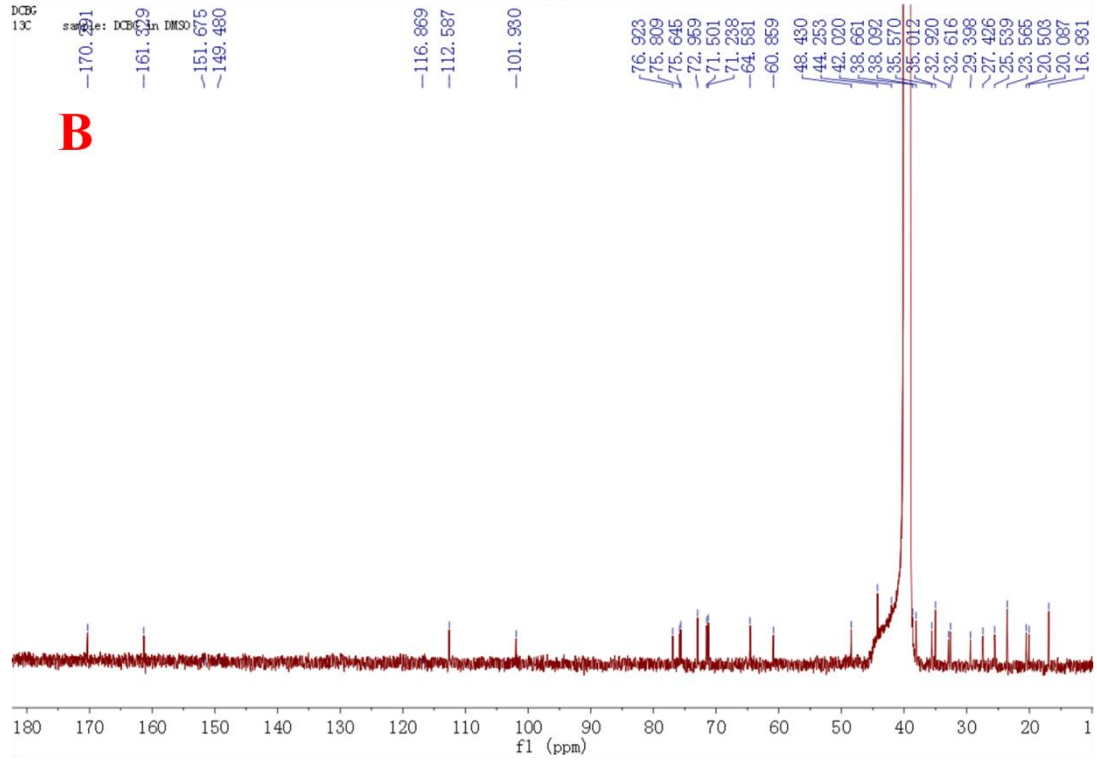

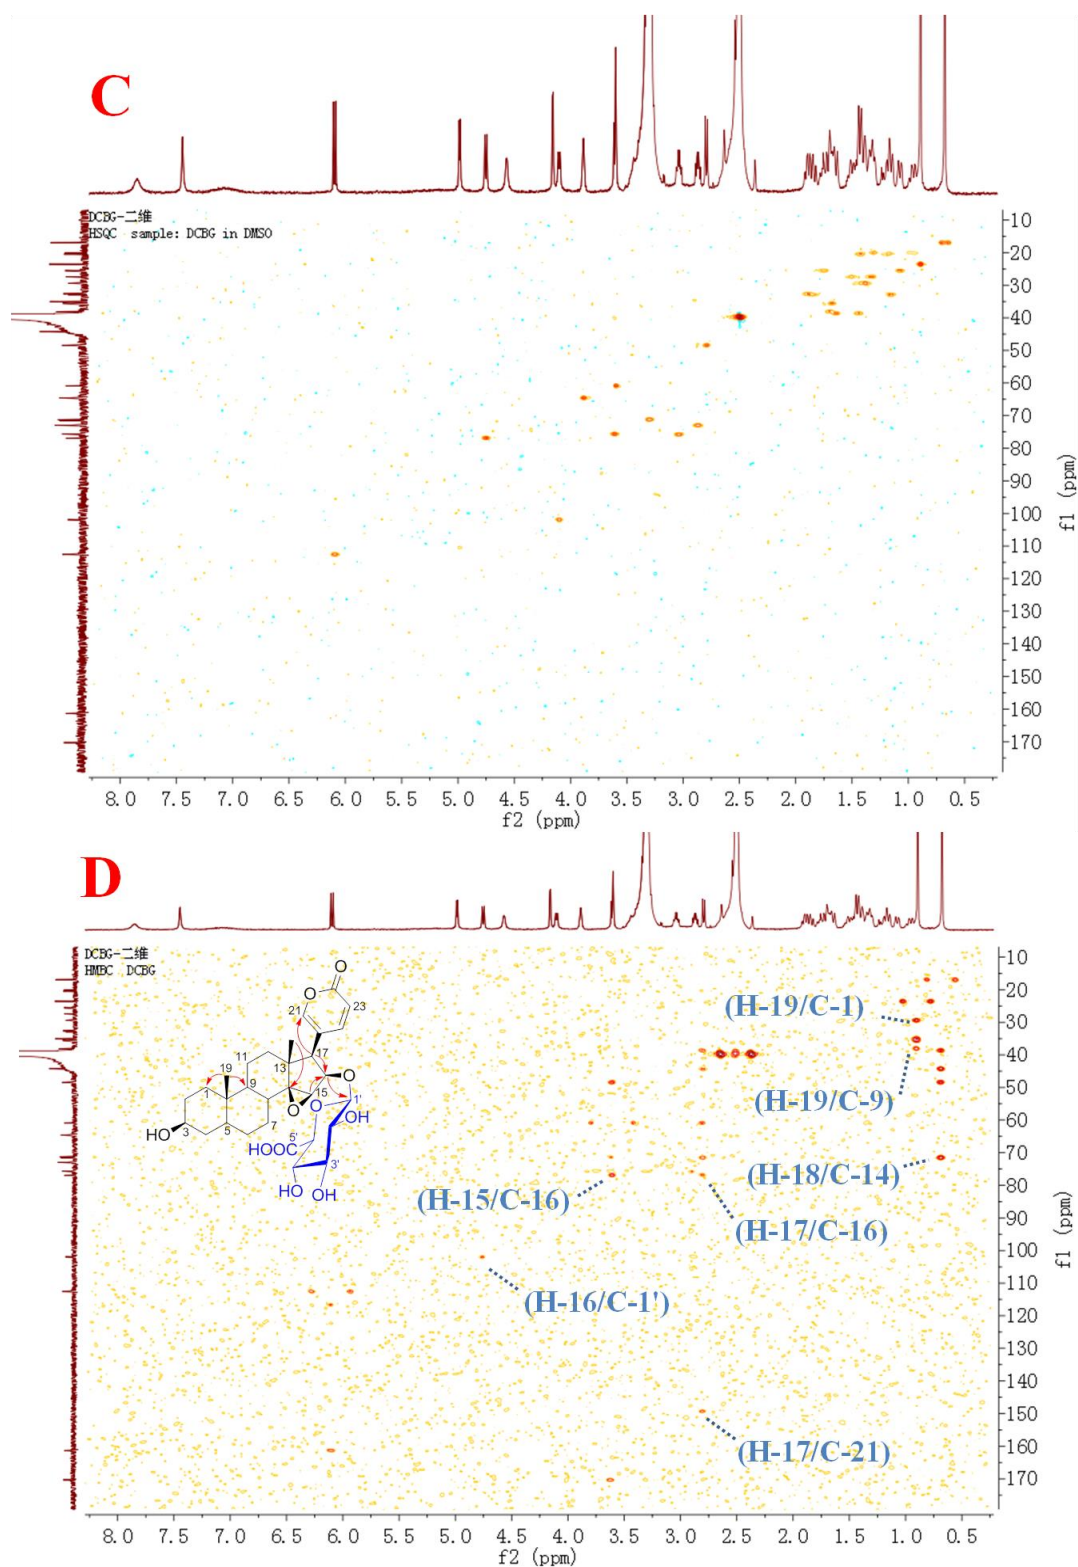

**Fig. S3.** The spectral data of M-2 (500MHz, DMSO). <sup>1</sup>H-NMR (A); <sup>13</sup>C-NMR (B); HMQC (C) and HMBC (D).

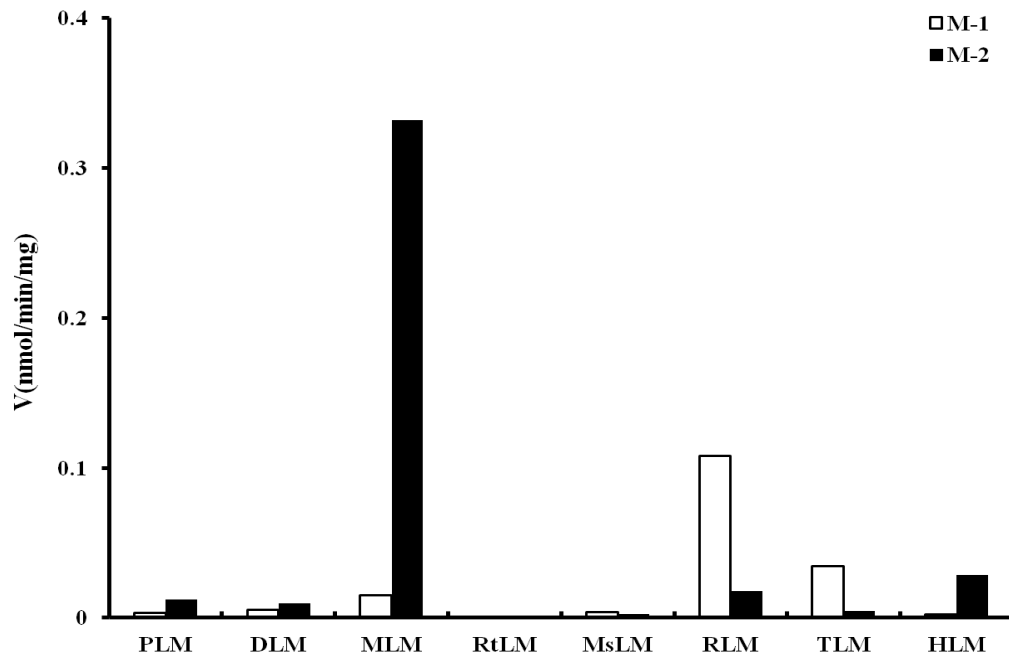

**Fig. S4** The formation rates of M-1 and M-2 in various species, including PLMs, DLMs, MLMs, RtLMs, MsLMs, RLMs, TLMs and HLMs.

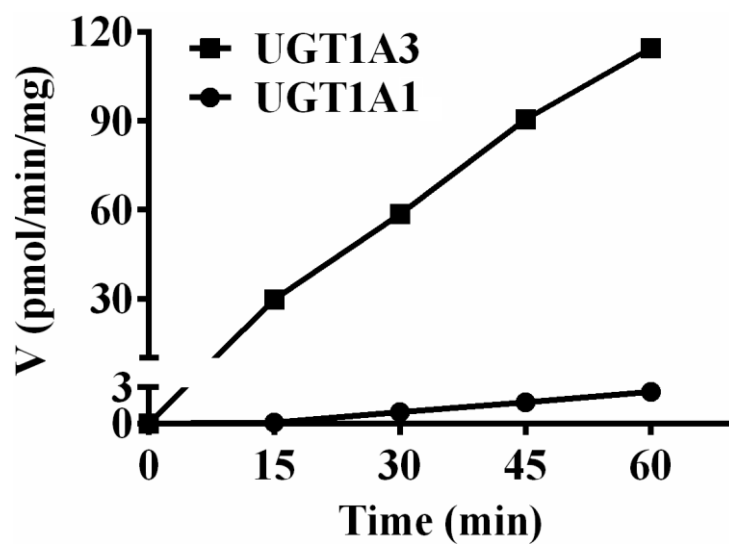

**Fig. S5** Time courses for DACB-16-*O*-glucuronidation by UGT1A3 and UGT1A1. The final substrate concentration was 50  $\mu$ M. Each data point represents the mean of triplicate determinations.

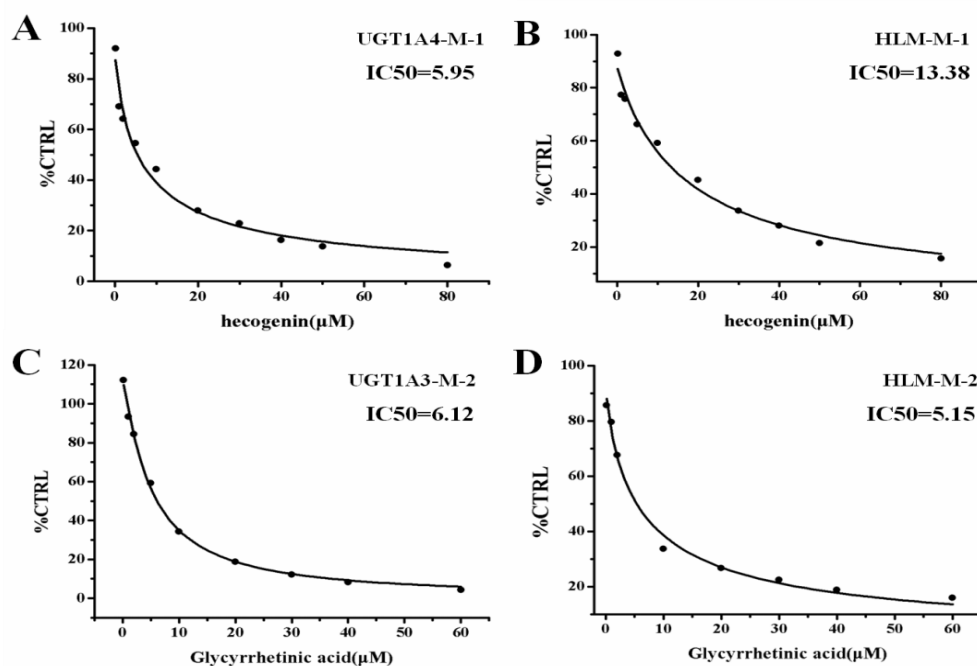

**Fig. S6.** IC<sub>50</sub> values of M-1 formation by hecogenin (a UGT1A4-specific inhibitor) in UGT1A4 samples (A) and HLMs (B); and IC<sub>50</sub> values for M-2 formation by glycyrrhethinic acid (a UGT1A3-specific inhibitor) in UGT1A3 samples (C) and HLMs (D), respectively.

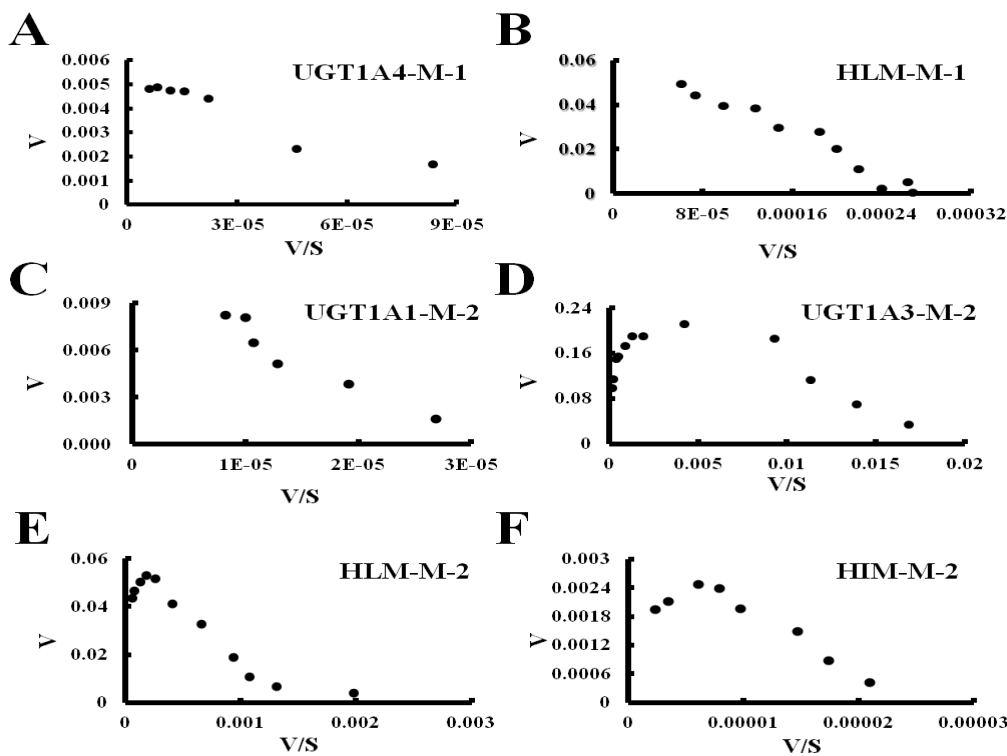

**Fig. S7** Eadie-Hofstee plots of the glucuronidation profiles to determine the best-fit equation. (A) UGT1A4 samples for M-1; (B) HLMs for M-1; (C) UGT1A1 samples for M-2; (D) UGT1A3 samples for M-2; (E) HLMs for M-2; and (F) HIMs for M-2.



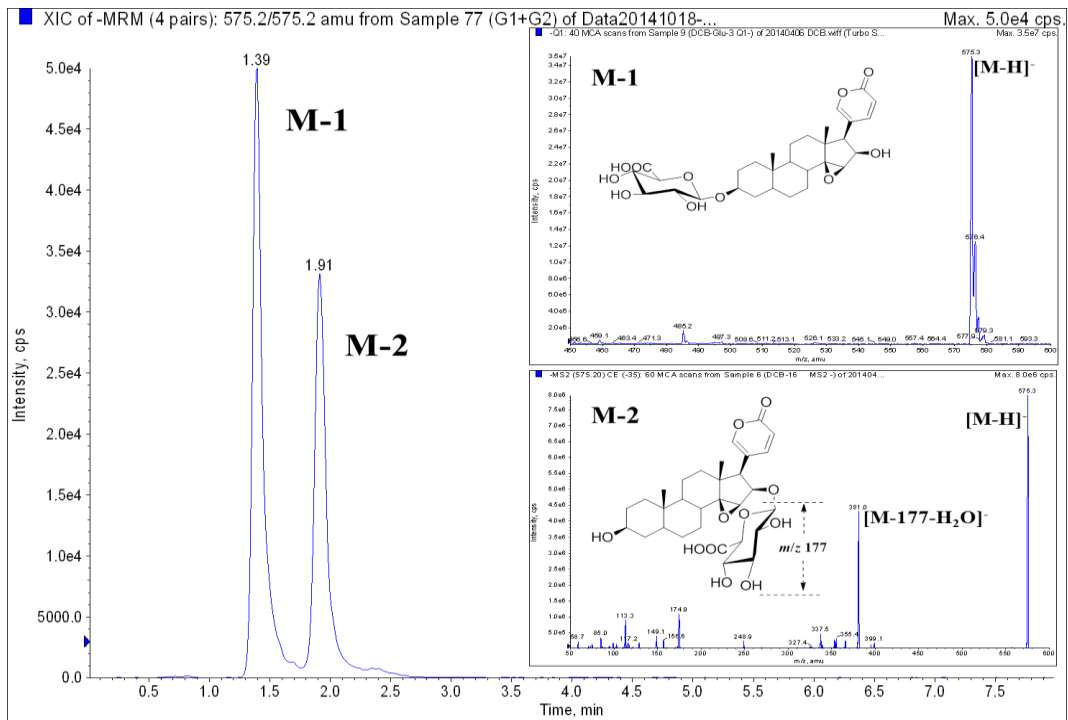

Fig. S8 MRM chromatogram of M-1 and M-2 in HLMs.

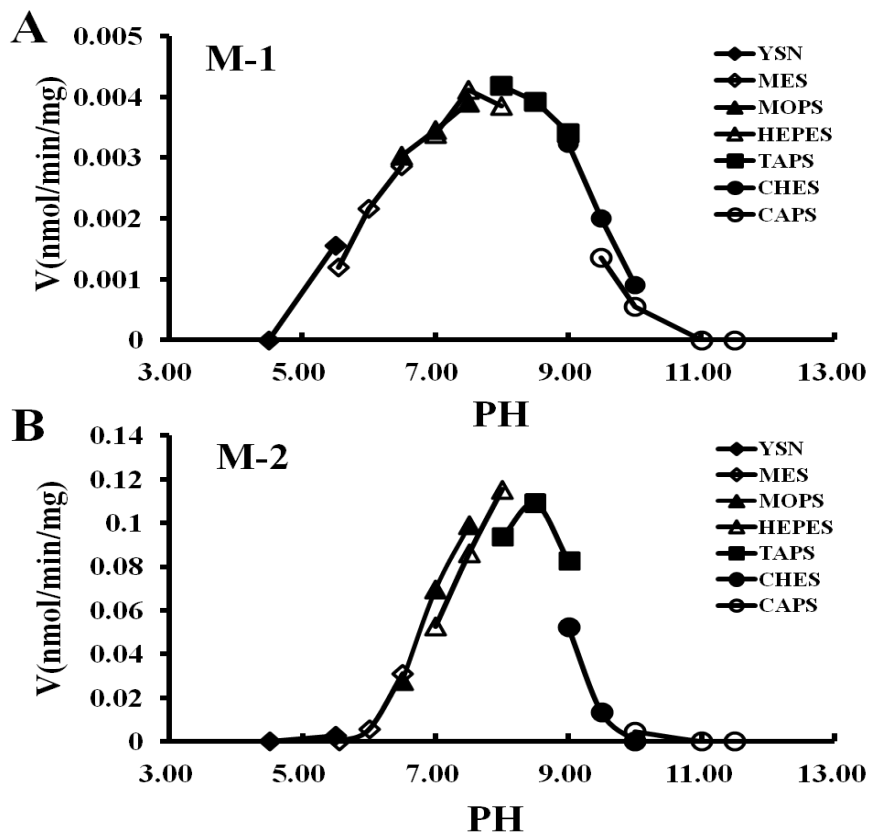

Fig. S9 The influences of various pH values for forming M-1(A) and M-2 (B).

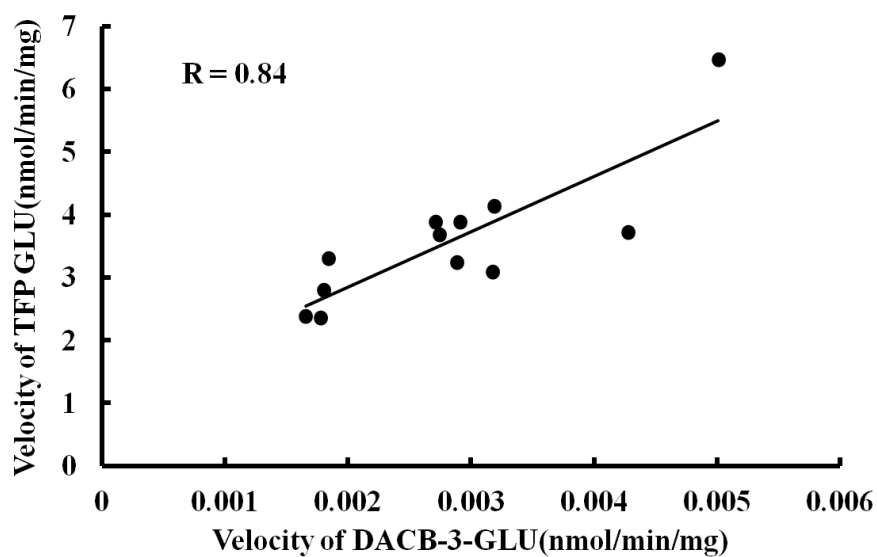

**Fig. S10** The correlation analysis between DACB-3-*O*-glucuronidation rates by UGT1A4 and TFP-*N*-glucuronidation by UGT1A4 in 12 individual HLMs.

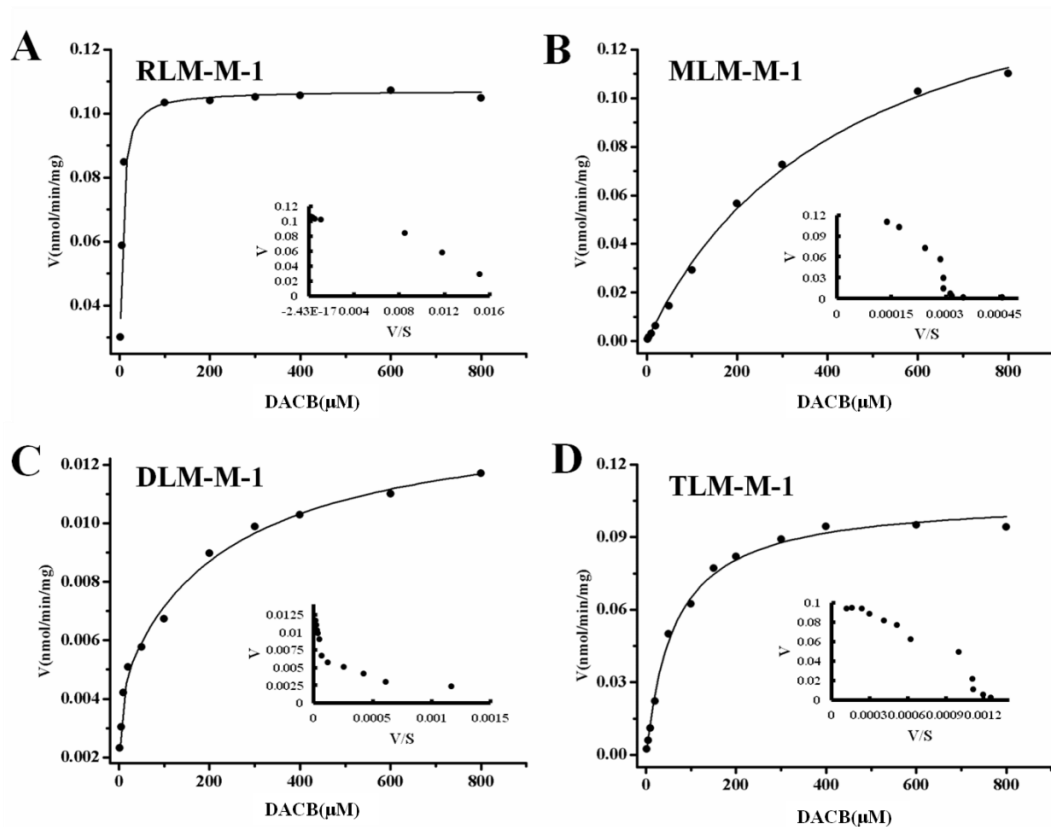

**Fig. S11** The enzyme kinetics of DACB glucuronidation at C-3 (M-1) in animal liver microsomes. (A) Rabbit liver microsomes; (B) Monkey liver microsomes; (C) Dog liver microsomes and (D) Guinea pig liver microsomes.

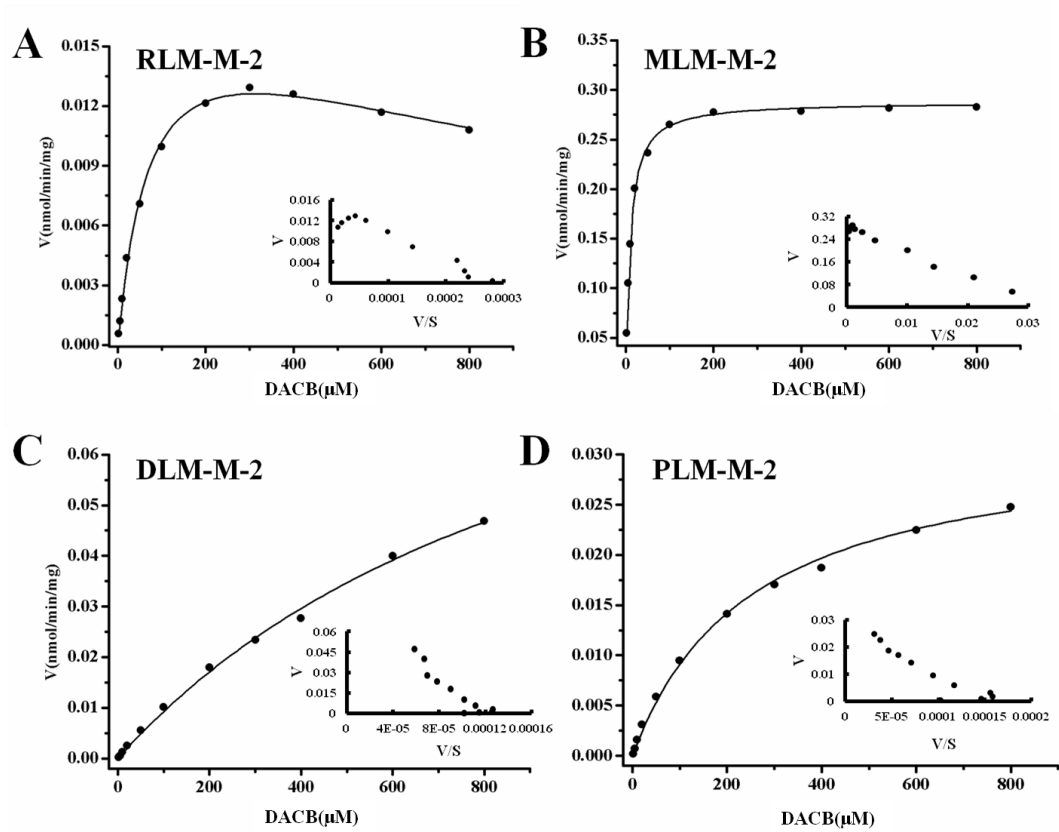

**Fig. S12** The enzyme kinetics of DACB glucuronidation at C-16 (M-2) in animal liver microsomes. (A) Rabbit liver microsomes; (B) Monkey liver microsomes; (C) Dog liver microsomes and (D) Pig liver microsomes.

**Table S1**  $^1\text{H}$ - and  $^{13}\text{C}$  NMR spectral data of M-1 and M-2 (DMSO- $d_6$ )

| No.       | M-1                           |                               | M-2                           |                               |
|-----------|-------------------------------|-------------------------------|-------------------------------|-------------------------------|
|           | $\delta_{\text{H}}$ (500 MHz) | $\delta_{\text{C}}$ (125 MHz) | $\delta_{\text{H}}$ (500 MHz) | $\delta_{\text{C}}$ (125 MHz) |
| <b>1</b>  | 1.72 m                        | 29.3                          | 1.43 m                        | 29.4                          |
|           | 1.41 m                        |                               | 1.38 m                        |                               |
| <b>2</b>  | 1.51 m                        | 25.9                          | 1.50 m                        | 27.4                          |
|           | 1.44 m                        |                               | 1.32 m                        |                               |
| <b>3</b>  | 3.89 brs                      | 73.4                          | 3.88 s                        | 64.6                          |
| <b>4</b>  | 1.50 m                        | 29.7                          | 1.84 m                        | 32.6                          |
|           | 1.41 m                        |                               | 1.15 m                        |                               |
| <b>5</b>  | 1.72 m                        | 35.5                          | 1.70 m                        | 35.6                          |
| <b>6</b>  | 1.74 m                        | 25.5                          | 1.75 m                        | 25.5                          |
|           | 1.11 m                        |                               | 1.07 m                        |                               |
| <b>7</b>  | 1.44 m                        | 20.5                          | 1.43 m                        | 20.5                          |
|           | 1.19 m                        |                               | 1.17 m                        |                               |
| <b>8</b>  | 1.89 m                        | 32.7                          | 1.87 m                        | 32.9                          |
| <b>9</b>  | 1.65 m                        | 38.5                          | 1.70 m                        | 38.1                          |
| <b>10</b> | —                             | 34.8                          | —                             | 35.0                          |
| <b>11</b> | 1.34 m                        | 20.2                          | 1.31 m                        | 20.1                          |
|           | 0.98 m                        |                               | 0.95 m                        |                               |
| <b>12</b> | 1.65 m                        | 38.7                          | 1.64 m                        | 38.7                          |
|           | 1.43 m                        |                               | 1.44 m                        |                               |
| <b>13</b> | —                             | 44.4                          | —                             | 44.3                          |
| <b>14</b> | —                             | 71.7                          | —                             | 71.5                          |
| <b>15</b> | 3.51 brs                      | 62.0                          | 3.60 s                        | 60.9                          |
| <b>16</b> | 4.63 d (9.0)                  | 70.5                          | 4.79 brd (8.5)                | 76.9                          |
| <b>17</b> | 2.59 d (9.0)                  | 50.9                          | 2.79 d (8.5)                  | 48.4                          |
| <b>18</b> | 0.66 s                        | 17.1                          | 0.68 s                        | 16.9                          |
| <b>19</b> | 0.90 s                        | 23.4                          | 0.89 s                        | 23.6                          |
| <b>20</b> | —                             | 117.9                         | —                             | 116.6                         |
| <b>21</b> | 7.45 d (2.0)                  | 151.1                         | 7.40 s                        | 151.8                         |
| <b>22</b> | 7.92 d (9.5)                  | 150.0                         | 7.80 brs                      | 149.6                         |
| <b>23</b> | 6.10 d (9.5)                  | 112.0                         | 6.10 d (10.0)                 | 112.6                         |
| <b>24</b> | —                             | 161.3                         | —                             | 161.3                         |
| <b>1'</b> | 4.26 d (7.5)                  | 101.5                         | 4.10 d (7.5)                  | 101.9                         |
| <b>2'</b> | 3.31 t (9.0)                  | 71.5                          | 3.30 m                        | 71.2                          |
| <b>3'</b> | 3.17 t (9.0)                  | 76.1                          | 3.04 m                        | 75.9                          |
| <b>4'</b> | 2.98 t (9.0)                  | 73.2                          | 2.87 m                        | 73.0                          |
| <b>5'</b> | 3.60 d (9.0)                  | 75.6                          | 3.61 d (8.0)                  | 75.6                          |
| <b>6'</b> | —                             | 170.4                         | —                             | 170.3                         |

**Table S2** Kinetic parameters of DACB-*O*-glucuronidation in microsomes of experimental animals

| Metabolites                              | Enzymes     | $K_m$              | $V_{max}$         | $Cl_{int}$     | $K_i$              |
|------------------------------------------|-------------|--------------------|-------------------|----------------|--------------------|
|                                          |             | $\mu M$            | nmol/min/mg       | $\mu L/min/mg$ | $\mu M$            |
| <b>3-<i>O</i>-Glucuronide<br/>(M-1)</b>  | <b>RLMs</b> | 3.95 $\pm$ 0.41    | 0.107 $\pm$ 0.002 | 27.848         | N/A                |
|                                          | <b>MLMs</b> | 439.53 $\pm$ 40.19 | 0.174 $\pm$ 0.008 | 0.387          | N/A                |
|                                          | <b>DLMs</b> | 2.19 $\pm$ 0.76    | 0.005 $\pm$ 0.001 | 2.054          | N/A                |
|                                          |             | 241.13 $\pm$ 63.40 | 0.009 $\pm$ 0.001 | 0.038          | N/A                |
|                                          | <b>TLMs</b> | 63.58 $\pm$ 5.33   | 0.106 $\pm$ 0.002 | 1.730          | N/A                |
| <b>16-<i>O</i>-Glucuronide<br/>(M-2)</b> | <b>RLMs</b> | 75.43 $\pm$ 7.01   | 0.018 $\pm$ 0.001 | 0.239          | 1284.5 $\pm$ 187.2 |
|                                          | <b>MLMs</b> | 9.18 $\pm$ 0.41    | 0.288 $\pm$ 0.002 | 31.59          | N/A                |
|                                          | <b>DLMs</b> | 1094.8 $\pm$ 140.1 | 0.111 $\pm$ 0.010 | 0.100          | N/A                |
|                                          | <b>PLMs</b> | 251.6 $\pm$ 22.7   | 0.032 $\pm$ 0.001 | 0.127          | N/A                |
